# Supplementary material
Source: HighWire-hosted journal article supplement (http://www.cmaj.ca/highwire/filestream/58939/field_highwire_adjunct_files/2/advice-garland-3-at.pdf)
Supplement: advice-garland-3-at.pdf [file advice-garland-3-at.pdf]

**APPENDIX 3 (as supplied by the authors): Full results of the General Estimating Equations logistic regression model for unscheduled 30-day hospital readmission**

| <i>Variable</i>                                | <i>Odds ratio*</i> | <i>95% C.I.</i> |
|------------------------------------------------|--------------------|-----------------|
| Left AMA from index hospitalization            |                    |                 |
| between-person effect                          | 3.035              | 2.793, 3.298    |
| within-person effect                           | 2.099              | 1.993, 2.209    |
| Any AMA discharges in prior 5 years            | 1.248              | 1.159, 1.344    |
| Number of hospitalizations in prior 5 years    | 1.117              | 1.112, 1.123    |
| Age (per year)                                 | 1.015              | 1.015, 1.016    |
| Male sex (vs. female)                          | 1.075              | 1.055, 1.095    |
| <i>Average household income quintile</i>       |                    |                 |
| Urban 1 [lowest urban stratum] (reference)     | --                 | --              |
| Urban 2                                        | 0.925              | 0.901, 0.951    |
| Urban 3                                        | 0.925              | 0.900, 0.951    |
| Urban 4                                        | 0.847              | 0.823, 0.872    |
| Urban 5 [highest urban stratum]                | 0.816              | 0.792, 0.840    |
| Rural 1 [lowest rural stratum]                 | 1.295              | 1.261, 1.330    |
| Rural 2                                        | 1.280              | 1.240, 1.321    |
| Rural 3                                        | 1.257              | 1.224, 1.291    |
| Rural 4                                        | 1.218              | 1.182, 1.256    |
| Rural 5 [highest rural stratum]                | 1.081              | 1.048, 1.115    |
| Not calculated                                 | 0.989              | 0.948, 1.031    |
| <i>Year of index hospitalization</i>           |                    |                 |
| 1990-1993                                      | 0.814              | 0.796, 0.832    |
| 1994-1998                                      | 0.934              | 0.915, 0.954    |
| 1999-2003                                      | 0.938              | 0.921, 0.955    |
| 2004-2009 (reference)                          | --                 | --              |
| <i>Comorbid conditions</i>                     |                    |                 |
| Metastatic cancer                              | 3.006              | 2.914, 3.101    |
| Lymphoma                                       | 2.452              | 2.314, 2.598    |
| AIDS/HIV                                       | 2.412              | 1.981, 2.938    |
| Renal failure                                  | 1.660              | 1.602, 1.720    |
| Liver disease                                  | 1.590              | 1.506, 1.677    |
| Solid tumor without metastasis                 | 1.453              | 1.410, 1.497    |
| Congestive heart failure                       | 1.436              | 1.406, 1.468    |
| Fluid and electrolyte disorders                | 1.330              | 1.288, 1.372    |
| Psychoses                                      | 1.313              | 1.234, 1.398    |
| Depression                                     | 1.253              | 1.202, 1.306    |
| Weight loss                                    | 1.252              | 1.157, 1.356    |
| Drug abuse                                     | 1.235              | 1.134, 1.344    |
| Peripheral vascular disease                    | 1.233              | 1.184, 1.284    |
| Diabetes                                       | 1.213              | 1.185, 1.241    |
| Coagulopathy                                   | 1.203              | 1.130, 1.279    |
| Rheumatoid arthritis/collagen-vascular disease | 1.190              | 1.132, 1.251    |
| Chronic pulmonary disease                      | 1.173              | 1.146, 1.199    |
| Other neurologic disorders                     | 1.166              | 1.126, 1.209    |
| Blood loss anemia                              | 1.154              | 1.075, 1.238    |
| Deficiency anemia                              | 1.154              | 1.095, 1.216    |
| Peptic ulcer disease w/o bleeding              | 1.138              | 1.062, 1.219    |
| Arrhythmia                                     | 1.083              | 1.058, 1.107    |
| Hypertension, complicated                      | 1.080              | 1.026, 1.137    |
| Valvular heart disease                         | 1.073              | 1.029, 1.119    |

|                                                            |       |              |
|------------------------------------------------------------|-------|--------------|
| Pulmonary circulation disorders                            | 1.071 | 1.005, 1.142 |
| Hypothyroidism                                             | 1.047 | 0.997, 1.099 |
| Paralysis                                                  | 1.002 | 0.944, 1.064 |
| Alcohol abuse                                              | 0.995 | 0.953, 1.039 |
| Hypertension, uncomplicated                                | 0.976 | 0.958, 0.994 |
| Obesity                                                    | 0.948 | 0.899, 1.000 |
| <i>Main index hospitalization admission diagnosis</i>      |       |              |
| Cardiovascular disorders (reference)                       | --    | --           |
| Complications of pregnancy, childbirth & the puerperium    | 2.112 | 2.047, 2.180 |
| Conditions originating in the perinatal period             | 1.268 | 0.264, 6.081 |
| Diseases of blood and blood-forming organs                 | 1.168 | 1.041, 1.310 |
| Symptoms, signs, and ill-defined conditions                | 0.975 | 0.947, 1.003 |
| Neoplasms                                                  | 0.942 | 0.913, 0.972 |
| Infectious and parasitic diseases                          | 0.934 | 0.885, 0.987 |
| Diseases of the digestive system                           | 0.928 | 0.907, 0.950 |
| Mental disorders                                           | 0.921 | 0.888, 0.955 |
| Diseases of the respiratory system                         | 0.901 | 0.880, 0.924 |
| Congenital anomalies                                       | 0.900 | 0.747, 1.085 |
| Endocrine, metabolic, nutritional, immune disorders        | 0.877 | 0.841, 0.914 |
| Diseases of the genitourinary system                       | 0.854 | 0.830, 0.879 |
| Factors influencing health status                          | 0.826 | 0.802, 0.851 |
| Diseases of nervous system and sense organs                | 0.751 | 0.703, 0.802 |
| Diseases of the skin and subcutaneous tissue               | 0.751 | 0.714, 0.790 |
| Injury and poisoning                                       | 0.739 | 0.718, 0.760 |
| Diseases of the musculoskeletal system & connective tissue | 0.736 | 0.713, 0.760 |
| Length of the index hospitalization (per day)              | 0.997 | 0.997, 0.998 |

AMA, left hospital against medical advice.

\* Odds ratios adjusted for: between-person and within-person AMA status, age, sex, year of index hospitalization, comorbid conditions, average household income, diagnosis of the index hospitalization, index hospitalization length of stay, number of hospitalizations in the five years prior to the index hospitalization, and existence of any AMA discharges in the five years prior to the index hospitalization
